# Facial masculinity does not appear to be a condition-dependent male ornament in humans and does not reflect MHC heterozygosity

Authors: Arslan A. Zaidi<sup>1a,b</sup>, Julie D. White<sup>1b</sup>, Brooke C. Mattern<sup>b</sup>, Corey R. Liebowitz<sup>b</sup>, David A. Puts<sup>b</sup>, Peter Claes<sup>c,d</sup>, Mark D. Shriver<sup>b</sup>

<sup>1</sup>These authors contributed equally

Author affiliations:

a. Department of Biology; Pennsylvania State University, University Park, 16802, Pennsylvania, United States of America

b. Department of Anthropology, Pennsylvania State University, University Park, 16802, Pennsylvania, United States of America

c. Department of Electrical Engineering, ESAT/PSI, KU Leuven, Leuven, Belgium

d. Medical Imaging Research Center, MIRC, UZ Leuven, Leuven, Belgium

Keywords: facial masculinity, MHC, HLA, heterozygosity, height, sexual selection, human evolution, immunocompetence handicap hypothesis, ICHH, complex traits, condition-dependence

## Abstract

Facial masculinity is thought to be a condition-dependent male ornament, reflecting immunocompetence in humans. To test this hypothesis, we calculated an objective measure of facial masculinity/femininity using three-dimensional images in a large sample (N = 1,233) of people of European ancestry. We show that facial masculinity is positively correlated with adult height in both males and females. This suggests that variation in growth contributes, at least in part, to variation in facial masculinity, which is characteristic of condition-dependent traits. However, facial masculinity scales with growth similarly in males and females, suggesting that facial masculinity is not specifically a male ornament. Additionally, we measured immunocompetence via heterozygosity at the major histocompatibility complex (MHC), a well known genetic marker of immunity. We show that while height is positively correlated with MHC heterozygosity, facial masculinity is not. Thus, facial masculinity does not reflect immunocompetence measured by MHC heterozygosity in humans as thought previously. Overall, we find no support for the idea that facial masculinity is a condition-dependent male ornament that has evolved to indicate immunocompetence.

## Introduction

The immunocompetence handicap hypothesis (ICHH) (1–3) was proposed to explain the evolution of secondary sexual characteristics (e.g., reindeer antlers and peacock trains), which grow to exaggerated proportions even though they might be detrimental to the fitness of the individual (4). According to the ICHH, androgens mediate the allocation of resources between the competing demands of fighting infection and the development of secondary sexual characteristics. Consequently, it is thought that males with more efficient immune systems can withstand greater immunosuppressive effects of androgens and can “afford” more extravagant displays (5–15). If this is true, then secondary sexual characteristics in males might be reliable (“honest”) indicators of physiological and immunological quality and strength to females and to other males (1, 2, 16). The ICHH has found some support in non-human animals (for review see Roberts et al., 2004 (17)). However, the mechanism through which sexual ornaments might have evolved to signal immunocompetence is not known.

A popular hypothesis that has been used to explain the evolution of sexual ornaments in non-human animals is condition-dependence (18–22). According to this hypothesis, sexual ornaments may have evolved to be more sensitive to the overall growth of the individual, which in turn is dependent on a variety of genetic and environmental factors, including immunocompetence, inbreeding, health status, and nutrient availability (23–25). Therefore, slight variation in immunocompetence among males could be amplified by large variation in the growth of sexual ornaments, making them ideal indicators of underlying health. Indeed, sexual ornaments are more variable in males and tend to be more sensitive to the overall growth of individual compared to other traits (23, 24, 26, 27). Traits such as tall height (28–30), facial masculinity (31, 32), and deep voices (33–37) are often thought of as sexual ornaments in humans as they are perceived to be attractive to females (38) and intimidating to other males (35, 39–41). However, the evidence that these traits reflect the condition or quality of males in humans is ambiguous and inconsistent across studies (17, 42–45). Some of the inconsistency could be due to methodological limitations of previous studies such as small sample size, lack of correction for population structure, and the use of perceived measures of masculinity and attractiveness, which are likely influenced by socio-cultural factors that are difficult to control in observational studies.

In this study, we investigated the ICHH in humans by testing for an association between immunocompetence, as measured by heterozygosity at the major histocompatibility (MHC) locus, and an objective measure of facial masculinity, a secondary sexual trait that is thought to have evolved to signal health and immune-function in humans (11, 46–50). Based on what we know about the condition-dependence of sexual ornaments (18–22), we tested three hypotheses:

Hypothesis 1: Facial masculinity is a condition-dependent male ornament in humans. If this is true, then we expect that facial masculinity would be a) correlated with height, b) more variable in males compared to females, and c) more strongly correlated with height in males compared to females.

Hypothesis 2: Immunocompetence is associated with adult height in humans. If immunocompetence plays a role in condition-dependent expression of secondary sexual characteristics, then it would be correlated with overall growth, measured by adult height, in humans.

Hypothesis 3: Facial masculinity reflects immunocompetence in men. Males who show greater immunocompetence should exhibit more masculine faces than males with lower immunocompetence, whereas facial masculinity should be less sensitive to variation in immunocompetence in females.

We used MHC heterozygosity to measure immunocompetence. The human MHC, also known as the Human Leukocyte Antigen (HLA) complex, is located on chromosome 6 and contains about 200 genes that are involved in immune-function (51). Higher genetic diversity at the MHC is correlated with immunocompetence, as it enables the immune system to recognize a more diverse array of foreign antigens (51–54). As a result, the MHC has experienced balancing selection in humans (51, 53–56) and therefore, heterozygosity at this locus serves as a useful proxy to measure immunocompetence.

In contrast with previous studies, we used an objective measure of facial masculinity, calculated at high resolution across the entire face, to test the ICHH in a large sample of persons of European ancestry. We also correct for genome-wide heterozygosity and population structure. Altogether our approach overcomes several key limitations of previous studies.

## Results

### *Variation in facial masculinity*

We calculated high resolution facial masculinity (FM) for the faces of 1,233 males and females of European ancestry from three-dimensional (3D) images, using a scalar-projection approach, similar to that described in (57) (Figure S6). 3D images were processed as described previously (58) allowing us to represent each face with a mesh of 7,150 points, or quasi-landmarks (QLs), each with  $x$ ,  $y$ , and  $z$  coordinates (58, 59). For every QL in the face, the signed difference between the coordinates of the average female and male faces represents the direction of sexual dimorphism in 3D space (Fig. S6A). We define FM for each of the 7,150 QLs ( $FM_{QL}$ ) as the degree of change in a target face ( $X$ ) along these vectors.

Fig. 1A shows a bimodal distribution of overall FM score (averaged across QLs - hereafter referred to as  $FM_{\text{overall}}$ ) where values of 0 and 1 represent  $FM_{\text{overall}}$  of the average female and male faces, respectively. The effect size of sex on  $FM_{\text{overall}}$  is comparable to that of height (Cohen's D of 1.98 compared with 2.10 for height). The brow ridge, cheekbones, and nose ridge show the greatest degree of sexual dimorphism, in agreement with previous studies (Fig. 1B) (60).

#### *Facial masculinity is positively correlated with height*

We tested the relationship between overall facial masculinity ( $FM_{\text{overall}}$ ) and growth, using height as a predictor, with sex, age, weight, and genetic PCs 1-3 as covariates (Fig. S9).  $FM_{\text{overall}}$  is positively correlated with height, even within the sexes (Fig. 2A; Table 1;  $t = 8.81$ ,  $p = 4.17 \times 10^{-18}$ ), suggesting that taller people have more masculine faces than shorter people. Because variation in size of the faces was removed before calculating facial masculinity (Methods), this correlation represents allometric effects of growth on sexual dimorphism in face *shape*, not *size*. The effect of height on facial masculinity appears to be concentrated around the orbital region, nasal bridge, cheeks, and the chin, with masculinity in these regions increasing with height (Figure 2B). It is interesting to note that the distribution of the effect of height on masculinity across the face appears to be different from the effect of sex (Figure 2B).

The effect of height on  $FM_{\text{overall}}$  is not significantly different between males and females ( $b_{\text{male}} = 0.227$ ,  $b_{\text{female}} = 0.299$ ,  $Z\text{-score}_{\text{diff}} = -1.18$ ,  $p = 0.120$ ), which agrees with the regional effects of height on  $FM_{\text{QL}}$  (Fig. S10).  $FM_{\text{overall}}$  is also not significantly more variable in one sex or the other (Levene's test  $p = 0.675$ ). Greater sensitivity to growth and higher variance in one sex relative to the other are classic signatures of sexual ornaments (19, 22, 24, 61), an expectation that facial masculinity does not meet. It is interesting to note that FM varies significantly along gPCs 1-3, suggesting that the patterns of sexual dimorphism and facial masculinity vary across populations, even within Europe (Table 1). This not only highlights the need to correct for population structure in future studies, but also calls for a detailed exploration of the variation in facial shape across populations.

#### *Height is positively correlated with immunocompetence*

We fit a linear model between height and MHC heterozygosity, while correcting for genome-wide heterozygosity, sex, age, and gPCs 1-3. MHC heterozygosity shows a positive correlation with height (Table 2;  $t = 3.18$ ,  $p = 0.0015$ ), indicating that individuals who are more heterozygous at the MHC locus tend to be taller than people who are less heterozygous. This relationship is not driven by genome-wide heterozygosity, as the latter is not significantly associated with height (Table 2;  $t = -0.36$ ,  $p = 0.72$ ). Also note that height varies significantly along gPC1 and gPC2, which is consistent with the clinal variation in stature observed within Europe (62, 63)

#### *Facial masculinity is not correlated with immunocompetence*

MHC heterozygosity is not significantly correlated with overall facial masculinity regardless of whether height is included in the model ( $t = -0.038$ ,  $p = 0.970$ ) or not ( $t = 0.586$ ,  $p = 0.558$ ). Thus, neither the allometric or non-allometric variation in facial masculinity is informative about MHC heterozygosity. Genome-wide heterozygosity is also not correlated with facial masculinity (height included as covariate:  $t = 0.02$ ,  $p = 0.986$ ; height not included as covariate:  $t = 0.65$ ,  $p = 0.516$ ). MHC heterozygosity is also not significantly correlated with regional measures of facial masculinity ( $FM_{QL}$ ; Fig. S11). We also did not find any difference in the effect of MHC heterozygosity on facial masculinity between males and females ( $b_{male} = 0.035$ ,  $b_{female} = -0.024$ ,  $Z\text{-score}_{diff} = 0.32$ ,  $p = 0.375$ ; Fig. S12).

## Discussion

The immunocompetence handicap hypothesis (ICHH) has been widely used to explain the evolution of elaborate male ornaments. According to the ICHH, sexual ornaments are sensitive to variation in immune function, and signal immunocompetence and status to ‘discerning’ females and competing males. In humans, several sexually dimorphic traits such as deep voices, stature, strength, and facial masculinity have been regarded as male ornaments, based on the idea that these traits develop under the influence of androgens, which can be immunosuppressive, that women find these traits attractive (32, 64–66), and that other males find them intimidating (35, 39–41). We aimed to investigate whether facial masculinity is a male ornament in humans that indicates immunocompetence.

### **Hypothesis 1: Facial masculinity is a condition-dependent male ornament in humans**

Condition-dependent sexual ornaments tend to be highly variable and sensitive to variation in growth among males, which in turn can be dependent on a variety of genetic and environmental factors, such as immunocompetence, inbreeding, health status and nutrient availability (23–25). We find a significant positive correlation between height and facial masculinity in both males and females. Thus, overall growth appears to contribute, at least in part, to variation in facial masculinity among individuals. However, sexual dimorphism in the face is not simply due to an extended growth period in males compared to females, as evidenced from our observation that sex has a significant effect on facial masculinity, independent of height. Additionally, our results indicate that facial masculinity is not more variable in males compared to females and the pattern of correlation between height and facial masculinity is similar across the sexes. Taken together, these results fail to support the hypothesis that facial masculinity is a condition-dependent male ornament, which should be more variable and more sensitive to growth in males (24, 25).

### **Hypothesis 2: Immunocompetence influences growth in humans**

There is a positive correlation between height and MHC heterozygosity, but not at loci across the rest of the genome. This result is consistent with the positive relationship between height and other measures of immunocompetence such as antibody titers (67, 68).

### **Hypothesis 3: Facial masculinity is an expression of immunocompetence**

Facial masculinity is not correlated with MHC heterozygosity, suggesting that facial masculinity does not reliably indicate this measure of immunocompetence. We also find no support for the contention that FM indicates heterozygosity across the genome generally, something that has also been proposed previously (20, 69).

Altogether, our results call into question some of the evolutionary explanations behind female and male perceptions of facial masculinity, and whether facial masculinity should be regarded as a condition-dependent sexual ornament in humans. Yet, our data show that sex differences in face shape are not merely developmental byproducts of greater male size. Little is known about the genetic and environmental factors contributing to differences in facial shape between males and females, or the variation in facial masculinity within the sexes. Differences in facial shape exist between male and female children as young as three years old (70, 71), and are likely defined, in part, during gestation by the intrauterine environment (72–74). Sexual dimorphism in the face increases dramatically at the onset of puberty, implicating sex hormones and other endocrine processes underlying general growth occurring around this period (70, 75–79). We do not know whether this degree of sexual dimorphism in facial shape is new to humans since their divergence from other hominins and apes, and if it perhaps evolved as a mechanism to intimidate rival males (80–82). Alternatively, facial sexual dimorphism may represent a vestigial trait that has decreased over time as a result of self-domestication (83–85). We also do not know how facial sexual dimorphism varies across human populations. We suspect that facial sexual dimorphism varies considerably across human populations, both in degree and pattern. We show that facial masculinity varies across populations, even within Europe. Is genetic drift sufficient to explain these patterns? How much have differences in perceptions of beauty and social status across populations shaped the evolution of sexual dimorphism, and facial shape in general? These gaps in our knowledge highlight the need for a more mechanistic understanding of both genetic and environmental factors underlying the development of sexual dimorphism, as well as an appreciation of the variation in facial shape within and across diverse human populations before we can cultivate a clearer picture of the role of sexual selection in human evolution.

## **Materials and Methods**

### *Participant recruitment*

Study participants were recruited in the United States through the Anthropology, DNA, and the Appearance and Perceptions of Traits (ADAPT) Study based at The Pennsylvania State University under Institutional Review Board (IRB) approved protocols (#44929, #45727). 3D images were taken using the 3dMD Face system (3dMD, Atlanta, GA). Height and weight were measured using an Accustat stadiometer (Genentech, South San Francisco, CA) and clinical scale (Tanita, Arlington Heights, IL). Genotyping was conducted by 23andMe (23andMe,



Mountain View, CA) on the v4 genome-wide SNP array. After filtering out SNPs with more than 10% missing genotypes, this array comprised of approximately 600K SNPs.

### *Data curation*

From the 2,721 participants with faces and genotype data, we removed individuals with missing covariate data, misclassified sex information, and individuals with more than 10% missing genotypes. We further restricted the analysis to unrelated individuals between 18 years of age and 30 years of age (to reduce the effects of aging). Relatives were identified as pairs of individuals with an identity-by-state (IBS) value of at least 0.8, after which one of each pair was removed, resulting in a set of 1,921 unrelated individuals (Fig. S1).

### *Ancestry and population structure*

We selected people of European ancestry as they were the largest sample in our dataset. To do so, we merged the genotype data from our sample (N = 1,921) with genotypes from the 1,000 Genomes Project dataset (N = 2,503). Prior to merging the genotype data, we removed SNPs that did not intersect between the two datasets, palindromic (A/T, G/C) SNPs, and SNPs that did not meet standard quality-control criteria (Fig. S1). SNPs were further pruned for linkage disequilibrium with a window size of 50 SNPs, a step size of 5 SNPs, and a variance inflation factor threshold of 2 using PLINK 1.9 (86, 87), resulting in 201,042 SNPs. Genetic ancestry was inferred using an unsupervised clustering scheme in ADMIXTURE with K ranging from 2 to 16 (Fig. S2 & S4) (88). We selected results from K=6 as this value had a low cross-validation error (Fig. S3) and showed separation based on continental ancestry (Fig. S2). 1,249 individuals of primarily European ancestry were identified based on ADMIXTURE output in comparison with European samples from the 1,000 Genomes Project (Fig. S4). We carried out principal components analysis on the genotypes of this subset and removed 16 outliers using the smartpca program in Eigensoft (Fig. S5) (89, 90), leading to a sample size of 1,233 individuals. The first three genetic PCs (gPCs) were used as covariates to correct for population structure.

### *Processing 3D photographs*

High-resolution 3D images were 'cleaned' to remove hair, ears, and disassociated polygons. Five positioning landmarks were placed (two on the inner corner of the eyes, two on the outer corners of the mouth, and one on the tip of the nose) to establish facial orientation. An anthropometric mask comprised of 10,000 quasi-landmarks (QLs), which is later trimmed to 7,150 QLs, was non-rigidly mapped (91) onto all 3D surfaces such that each QL is spatially homologous across individuals (92). Thus, every face can be represented by a configuration of 7,150 QLs, each with three coordinates (x, y, and z). For each face, a mirror image was created by changing the sign of the x coordinates following (93), which was mapped with QLs in the same way as the original, non-reflected face. A generalized Procrustes superimposition (94) of both the original and reflected images together was performed to eliminate differences in position, orientation, and scale. At this point, the variation in face shape can be decomposed

into the symmetric (average of mirror QL configuration) and asymmetric (difference of mirror QL configurations) components of facial shape (60).

### *Calculating facial masculinity*

We define facial masculinity/femininity as the magnitude of change in aspects of the face that are different, on average, between males and females in the population. Thus, facial masculinity can be represented as the degree of change in the direction from an average female face to an average male face. Conversely, facial femininity is the magnitude of change in the opposite direction. We calculated facial masculinity (FM) per quasi-landmark (QL) for every face, using a scalar-projection approach (Figure S6) (57). First, we generate female and male consensus faces from the sample by averaging the QL configurations across all females and all males, respectively. For every QL in the face, the signed difference between the coordinates of the male and female consensus faces is a three-dimensional vector  $\vec{V}_{FM}$  that represents the direction of sexual dimorphism in 3D space (Figure S6A). The goal is to calculate the degree of change in each QL of a target face X along these vectors (*i.e.*, one for each of the 7,150 QLs), which is the FM per QL ( $FM_{QL}$ ). This can be done by computing the scalar projection of  $\vec{V}_{FX}$ , the difference between X and the female consensus face, onto  $\vec{V}_{FM}$  (Figure S6C).

$$\text{Facial masculinity per QL (FM}_{QL}\text{)} = \frac{\vec{V}_{FM} \cdot \vec{V}_{FX}}{|\vec{V}_{FM}|}$$

### *Genomic and MHC heterozygosity*

We defined individual heterozygosity as the proportion of heterozygous SNPs in a region. Genome-wide heterozygosity was calculated from a total of 192,417 LD-pruned, autosomal SNPs. To measure MHC heterozygosity, we obtained a list of 195 SNPs tagging haplotype variation for the classical HLA genes in Europeans (95). We used 114 of these SNPs, the subset for which our samples were genotyped (Fig. S7), to calculate MHC heterozygosity. These SNPs capture most of the HLA alleles (95) and the heterozygosity calculated using the subset of 114 SNPs is highly correlated with heterozygosity calculated using all 195 markers in the sample of Europeans available in the 1000 Genomes Project dataset (Fig. S8) (96).

### *Data availability*

The informed consent with which the data were collected does not allow for dissemination of identifiable data to persons not listed as researchers on the IRB protocol. Thus, the raw genotype data and 3D images cannot be made publically available. In the interest of reproducibility, we have provided de-identified overall facial masculinity measures as well as age, sex, weight, height, ancestry, genetic PCs, and MHC and genome-wide heterozygosity,



from which all results presented in this manuscript can be reproduced. In addition, we also provide high-density facial masculinity maps, i.e, facial masculinity calculated for every quasi-landmark ( $FM_{QL}$ ) for all 1,233 individuals used in the analyses. This resource will allow other researchers to study variation in facial masculinity with high resolution in a large sample. We have made all scripts available on the following GitHub repository: <https://github.com/Arslan-Zaidi>.

## Acknowledgements

We thank the participants for providing the data necessary to carry out this study. We are grateful to the members of Shriver Lab and Puts Lab for helping with data collection. Finally, we would like to thank Tina Lasisi and Tomás González-Zarzar for helpful discussions on the manuscript.

## Works Cited

1. Zahavi A (1975) Mate selection-a selection for a handicap. *Journal of Theoretical Biology* 53(1):205–214.
2. Hamilton WD, Zuk M (1989) Parasites and sexual selection. *Nature* 341(6240):289–290.
3. Hamilton W, Zuk M (1982) Heritable true fitness and bright birds: a role for parasites? *Science* 218(4570):384–387.
4. Darwin C (1859) *On the Origin of Species by Means of Natural Selection: Or, The Preservation of Favored Races in the Struggle for Life* (John Murray, London).
5. Grossman CJ (1994) The Role of Sex Steroids in Immune System Regulation. *Bilateral Communication Between Endocrine and Immune Systems*, Endocrinology and Metabolism (Progress in Research and Clinical Practice)., ed Grossman CJ (Springer, New York, NY), pp 1–11.
6. Chao TC, Van Alten PJ, Walter RJ (1994) Steroid sex hormones and macrophage function: modulation of reactive oxygen intermediates and nitrite release. *American Journal of Reproductive Immunology* 32(1):43–52.
7. Muehlenbein MP, Bribiescas RG (2005) Testosterone-mediated immune functions and male life histories. *American Journal of Human Biology* 17(5):527–558.
8. Muehlenbein MP, Alger J, Cogswell F, James M, Krogstad D (2005) The reproductive endocrine response to Plasmodium vivax infection in Hondurans. *The American Journal of Tropical Medicine and Hygiene* 73(1):178–187.
9. Muehlenbein MP, Cogswell FB, James MA, Koterski J, Ludwig GV (2006) Testosterone correlates with Venezuelan equine encephalitis virus infection in macaques. *Virology Journal* 3:19.
10. Folstad I, Karter AJ (1992) Parasites, Bright Males, and the Immunocompetence Handicap.

*The American Naturalist* 139(3):603–622.

11. Rantala MJ, et al. (2012) Evidence for the stress-linked immunocompetence handicap hypothesis in humans. *Nature Communications* 3:694.
12. Rettew JA, Huet-Hudson YM, Marriott I (2008) Testosterone reduces macrophage expression in the mouse of toll-like receptor 4, a trigger for inflammation and innate immunity. *Biology of Reproduction* 78(3):432–437.
13. Lai J-J, et al. (2012) Androgen Receptor Influences on Body Defense System via Modulation of Innate and Adaptive Immune Systems: Lessons from Conditional AR Knockout Mice. *The American Journal of Pathology* 181(5):1504.
14. Møller AP, Christe P, Lux E (1999) Parasitism, host immune function, and sexual selection. *The Quarterly Review of Biology* 74(1):3–20.
15. Boonekamp JJ, Ros AHF, Verhulst S (2008) Immune activation suppresses plasma testosterone level: a meta-analysis. *Biology Letters* 4(6):741–744.
16. Andersson MB (1994) *Sexual Selection* (Princeton University Press, Princeton, NJ).
17. Roberts ML, Buchanan KL, Evans MR (2004) Testing the immunocompetence handicap hypothesis: a review of the evidence. *Animal Behaviour* 68(2):227–239.
18. Andersson M (1986) Evolution of condition-dependent sex ornaments and mating preferences: Sexual selection based on viability differences. *Evolution* 40(4):804–816.
19. Iwasa Y, Pomiankowski A (1994) The evolution of mate preferences for multiple sexual ornaments. *Evolution* 48(3):853–867.
20. Rowe L, Houle D (1996) The Lek Paradox and the Capture of Genetic Variance by Condition Dependent Traits. *Proceedings of the Royal Society B: Biological Sciences* 263(1375):1415–1421.
21. Bellamy L, Fowler K, Pomiankowski A (2014) The Use of Inbreeding to Assess the Genetic Component of Condition Underlying GEIs in Sexual Traits. *Genotype-by-Environment Interactions and Sexual Selection*, eds Hunt J, Hosken D (John Wiley & Sons, Ltd, West Sussex), pp 213–240.
22. Cotton S, Fowler K, Pomiankowski A (2004) Do sexual ornaments demonstrate heightened condition-dependent expression as predicted by the handicap hypothesis? *Proceedings of the Royal Society B: Biological Sciences* 271(1541):771–783.
23. Cotton S, Fowler K, Pomiankowski A (2004) Condition dependence of sexual ornament size and variation in the stalk-eyed fly *Cyrtodiopsis dalmanni* (Diptera: Diopsidae). *Evolution* 58(5):1038–1046.
24. Emlen DJ, Warren IA, Johns A, Dworkin I, Lavine LC (2012) A mechanism of extreme growth and reliable signaling in sexually selected ornaments and weapons. *Science* 337(6096):860–864.

25. Warren IA, Gotoh H, Dworkin IM, Emlen DJ, Lavine LC (2013) A general mechanism for conditional expression of exaggerated sexually-selected traits. *Bioessays* 35(10):889–899.
26. Johns A, Gotoh H, McCullough EL, Emlen DJ, Lavine LC (2014) Heightened condition-dependent growth of sexually selected weapons in the rhinoceros beetle, *Trypoxylus dichotomus* (Coleoptera: Scarabaeidae). *Integrative and Comparative Biology* 54(4):614–621.
27. Gotoh H, et al. (2014) Developmental link between sex and nutrition; doublesex regulates sex-specific mandible growth via juvenile hormone signaling in stag beetles. *PLoS Genet* 10(1):e1004098.
28. Pawlowski B, Dunbar RI, Lipowicz A (2000) Tall men have more reproductive success. *Nature* 403(6766):156.
29. Courtiol A, Raymond M, Godelle B, Ferdy J-B (2010) Mate choice and human stature: homogamy as a unified framework for understanding mating preferences. *Evolution* 64(8):2189–2203.
30. Stulp G, Mills M, Pollet TV, Barrett L (2014) Non-linear associations between stature and mate choice characteristics for American men and their spouses. *American Journal of Human Biology* 26(4):530–537.
31. Johnston VS, Hagel R, Franklin M, Fink B, Grammer K (2001) Male facial attractiveness: evidence for hormone-mediated adaptive design. *Evolution and Human Behavior* 22(4):251–267.
32. Little AC, Jones BC, Penton-Voak IS, Burt DM, Perrett DI (2002) Partnership status and the temporal context of relationships influence human female preferences for sexual dimorphism in male face shape. *Proceedings of the Royal Society B: Biological Sciences* 269(1496):1095–1100.
33. Collins SA (2000) Men's voices and women's choices. *Animal Behaviour* 60(6):773–780.
34. Feinberg DR, Jones BC, Little AC, Burt DM, Perrett DI (2005) Manipulations of fundamental and formant frequencies influence the attractiveness of human male voices. *Animal Behaviour* 69(3):561–568.
35. Puts DA, Jones BC, DeBruine LM (2012) Sexual selection on human faces and voices. *Journal of Sex Research* 49(2-3):227–243.
36. Puts DA, Doll LM, Hill AK (2014) Sexual Selection on Human Voices. *Evolutionary Perspectives on Human Sexual Psychology and Behavior*, Evolutionary Psychology., eds Weekes-Shackelford V, Shackelford T (Springer, New York), pp 69–86.
37. Shirazi TN, Puts DA, Escasa-Dorne MJ (2018) Filipino Women's Preferences for Male Voice Pitch: Intra-Individual, Life History, and Hormonal Predictors. *Adaptive Human Behavior and Physiology*. doi:10.1007/s40750-018-0087-2.
38. Scott IML, Clark AP, Boothroyd LG, Penton-Voak IS (2012) Do men's faces really signal

- heritable immunocompetence? *Behavioral Ecology* 24(3):579–589.
39. Hill AK, Bailey DH, Puts DA (2017) Gorillas in Our Midst? Human Sexual Dimorphism and Contest Competition in Men. *On Human Nature*, eds Tibayrenc M, Ayala FJ (Academic Press, San Diego), pp 235–249.
  40. Hill AK, et al. (2013) Quantifying the strength and form of sexual selection on men's traits. *Evolution and Human Behavior* 34(5):334–341.
  41. Puts DA, Bailey DH, Reno PL (2015) Contest Competition in Men. *The Handbook of Evolutionary Psychology*, pp 1–18.
  42. Thornhill R (2003) Major histocompatibility complex genes, symmetry, and body scent attractiveness in men and women. *Behavioral Ecology* 14(5):668–678.
  43. Lie HC, Rhodes G, Simmons LW (2008) Genetic diversity revealed in human faces. *Evolution* 62(10):2473–2486.
  44. Havlicek J, Roberts SC (2009) MHC-correlated mate choice in humans: a review. *Psychoneuroendocrinology* 34(4):497–512.
  45. Rantala MJ, et al. (2013) Adiposity, compared with masculinity, serves as a more valid cue to immunocompetence in human mate choice. *Proceedings of the Royal Society B: Biological Sciences* 280(1751):20122495.
  46. Rhodes G, Chan J, Zebrowitz LA, Simmons LW (2003) Does sexual dimorphism in human faces signal health? *Proceedings of the Royal Society B: Biological Sciences* 270 Suppl 1:S93–5.
  47. Thornhill R, Gangestad SW (2006) Facial sexual dimorphism, developmental stability, and susceptibility to disease in men and women. *Evolution and Human Behavior* 27(2):131–144.
  48. Scheib JE, Gangestad SW, Thornhill R (1999) Facial attractiveness, symmetry and cues of good genes. *Proceedings of the Royal Society B: Biological Sciences* 266(1431):1913–1917.
  49. Boothroyd LG, Scott I, Gray AW, Coombes CI, Pound N (2013) Male facial masculinity as a cue to health outcomes. *Evolutionary Psychology* 11(5):1044–1058.
  50. Little AC, Jones BC, DeBruine LM (2011) Facial attractiveness: evolutionary based research. *Philosophical Transactions of the Royal Society B: Biological Sciences* 366(1571):1638–1659.
  51. Shiina T, Hosomichi K, Inoko H, Kulski JK (2009) The HLA genomic loci map: expression, interaction, diversity and disease. *Journal of Human Genetics* 54(1):15–39.
  52. Hedrick PW, Thomson G (1983) Evidence for balancing selection at HLA. *Genetics* 104(3):449–456.
  53. Yasukochi Y, Satta Y (2013) Current perspectives on the intensity of natural selection of

- MHC loci. *Immunogenetics* 65(6):479–483.
54. DeGiorgio M, Lohmueller KE, Nielsen R (2014) A model-based approach for identifying signatures of ancient balancing selection in genetic data. *PLoS Genetics* 10(8):e1004561.
  55. Hedrick PW (1998) Balancing selection and MHC. *Genetica* 104(3):207–214.
  56. Andrés AM, et al. (2009) Targets of balancing selection in the human genome. *Molecular Biology and Evolution* 26(12):2755–2764.
  57. Valenzano DR, Mennucci A, Tartarelli G, Cellerino A (2006) Shape analysis of female facial attractiveness. *Vision Research* 46(8-9):1282–1291.
  58. Claes P, et al. (2014) Modeling 3D facial shape from DNA. *PLoS Genetics* 10(3):e1004224.
  59. Claes P, et al. (2018) Genome-wide mapping of global-to-local genetic effects on human facial shape. *Nature Genetics*. doi:10.1038/s41588-018-0057-4.
  60. Claes P, et al. (2012) Sexual dimorphism in multiple aspects of 3D facial symmetry and asymmetry defined by spatially dense geometric morphometrics. *Journal of Anatomy* 221(2):97–114.
  61. Fitzpatrick S (1997) Patterns of morphometric variation in birds' tails: length, shape and variability. *Biological Journal of the Linnean Society* 62(1):145–162.
  62. Grasgruber P, Cacek J, Kalina T, Sebera M (2014) The role of nutrition and genetics as key determinants of the positive height trend. *Economics and Human Biology* 15:81–100.
  63. Robinson MR, et al. (2015) Population genetic differentiation of height and body mass index across Europe. *Nature Genetics* 47(11):1357–1362.
  64. Ditzen B, Palm-Fischbacher S, Gossweiler L, Stucky L, Ehlert U (2017) Effects of stress on women's preference for male facial masculinity and their endocrine correlates. *Psychoneuroendocrinology* 82:67–74.
  65. Penton-Voak IS, Perrett DI (2000) Female preference for male faces changes cyclically. *Evolution and Human Behavior* 21(1):39–48.
  66. Penton-Voak IS, et al. (1999) Menstrual cycle alters face preference. *Nature* 399(6738):741–742.
  67. Krams IA, et al. (2014) Body height affects the strength of immune response in young men, but not young women. *Scientific Reports* 4(1). doi:10.1038/srep06223.
  68. Skrinda I, et al. (2014) Body height, immunity, facial and vocal attractiveness in young men. *Naturwissenschaften* 101(12):1017–1025.
  69. Brown JL (1997) A theory of mate choice based on heterozygosity. *Behavioral Ecology* 8(1):60–65.
  70. Kesterke MJ, et al. (2016) Using the 3D Facial Norms Database to investigate craniofacial

sexual dimorphism in healthy children, adolescents, and adults. *Biology of Sex Differences* 7:23.

71. Matthews H, et al. (2016) Spatially dense morphometrics of craniofacial sexual dimorphism in 1-year-olds. *Journal of Anatomy* 229(4):549–559.
72. Manning J, Kilduff L, Cook C, Crewther B, Fink B (2014) Digit Ratio (2D:4D): A Biomarker for Prenatal Sex Steroids and Adult Sex Steroids in Challenge Situations. *Frontiers in Endocrinology* 5:9.
73. Weinberg SM, Parsons TE, Raffensperger ZD, Marazita ML (2015) Prenatal sex hormones, digit ratio, and face shape in adult males. *Orthodontics and Craniofacial Research* 18(1):21–26.
74. Neave N, Laing S, Fink B, Manning JT (2003) Second to fourth digit ratio, testosterone and perceived male dominance. *Proceedings of the Royal Society B: Biological Sciences* 270(1529):2167–2172.
75. Verdonck A (1999) Effect of low-dose testosterone treatment on craniofacial growth in boys with delayed puberty. *European Journal of Orthodontics* 21(2):137–143.
76. Smith MJL, et al. (2006) Facial appearance is a cue to oestrogen levels in women. *Proceedings of the Royal Society B: Biological Sciences* 273(1583):135–140.
77. Marečková K, et al. (2011) Testosterone-mediated sex differences in the face shape during adolescence: subjective impressions and objective features. *Hormones and Behavior* 60(5):681–690.
78. Whitehouse AJO, et al. (2015) Prenatal testosterone exposure is related to sexually dimorphic facial morphology in adulthood. *Proceedings of the Royal Society B: Biological Sciences* 282(1816):20151351.
79. Bulygina E, Mitteroecker P, Aiello L (2006) Ontogeny of facial dimorphism and patterns of individual development within one human population. *American Journal of Physical Anthropology* 131(3):432–443.
80. Puts DA, et al. (2016) Sexual selection on male vocal fundamental frequency in humans and other anthropoids. *Proceedings of the Royal Society B: Biological Sciences* 283(1829). doi:10.1098/rspb.2015.2830.
81. Puts DA (2010) Beauty and the beast: mechanisms of sexual selection in humans. *Evolution and Human Behavior* 31(3):157–175.
82. Lee KS, et al. (2018) Selection on the regulation of sympathetic nervous activity in humans and chimpanzees. *PLoS Genet* 14(4):e1007311.
83. Theofanopoulou C, et al. (2017) Self-domestication in Homo sapiens: Insights from comparative genomics. *PLoS One* 12(10):e0185306.
84. Wilkins AS, Wrangham RW, Fitch WT (2014) The “domestication syndrome” in mammals: a unified explanation based on neural crest cell behavior and genetics. *Genetics*



197(3):795–808.

85. Clark G, Henneberg M (2015) The life history of *Ardipithecus ramidus*: a heterochronic model of sexual and social maturation. *Anthropological Review* 78(2). doi:10.1515/anre-2015-0009.
86. Purcell S, et al. (2007) PLINK: a tool set for whole-genome association and population-based linkage analyses. *American Journal of Human Genetics* 81(3):559–575.
87. Chang CC, et al. (2015) Second-generation PLINK: rising to the challenge of larger and richer datasets. *Gigascience* 4:7.
88. Alexander DH, Novembre J, Lange K (2009) Fast model-based estimation of ancestry in unrelated individuals. *Genome Research* 19(9):1655–1664.
89. Price AL, et al. (2006) Principal components analysis corrects for stratification in genome-wide association studies. *Nature Genetics* 38(8):904–909.
90. Patterson N, Price AL, Reich D (2006) Population structure and eigenanalysis. *PLoS Genetics* 2(12):e190.
91. Claes P, et al. (2015) An investigation of matching symmetry in the human pinnae with possible implications for 3D ear recognition and sound localization. *Journal of Anatomy* 226(1):60–72.
92. Claes P, Walters M, Vandermeulen D, Clement JG (2011) Spatially-dense 3D facial asymmetry assessment in both typical and disordered growth. *Journal of Anatomy* 219(4):444–455.
93. Klingenberg CP, Barluenga M, Meyer A (2002) Shape analysis of symmetric structures: quantifying variation among individuals and asymmetry. *Evolution* 56(10):1909–1920.
94. Rohlf FJ, James Rohlf F, Slice D (1990) Extensions of the Procrustes Method for the Optimal Superimposition of Landmarks. *Systematic Zoology* 39(1):40.
95. de Bakker PIW, et al. (2006) A high-resolution HLA and SNP haplotype map for disease association studies in the extended human MHC. *Nature Genetics* 38(10):1166–1172.
96. 1000 Genomes Project Consortium, et al. (2012) An integrated map of genetic variation from 1,092 human genomes. *Nature* 491(7422):56–65.

**Fig. 1:** Sexual dimorphism in the face. A) Density plot showing a bimodal distribution of facial masculinity. B) Heatmaps showing the magnitude (top) and Cohen's D (bottom) of sexual dimorphism between average male and female faces.

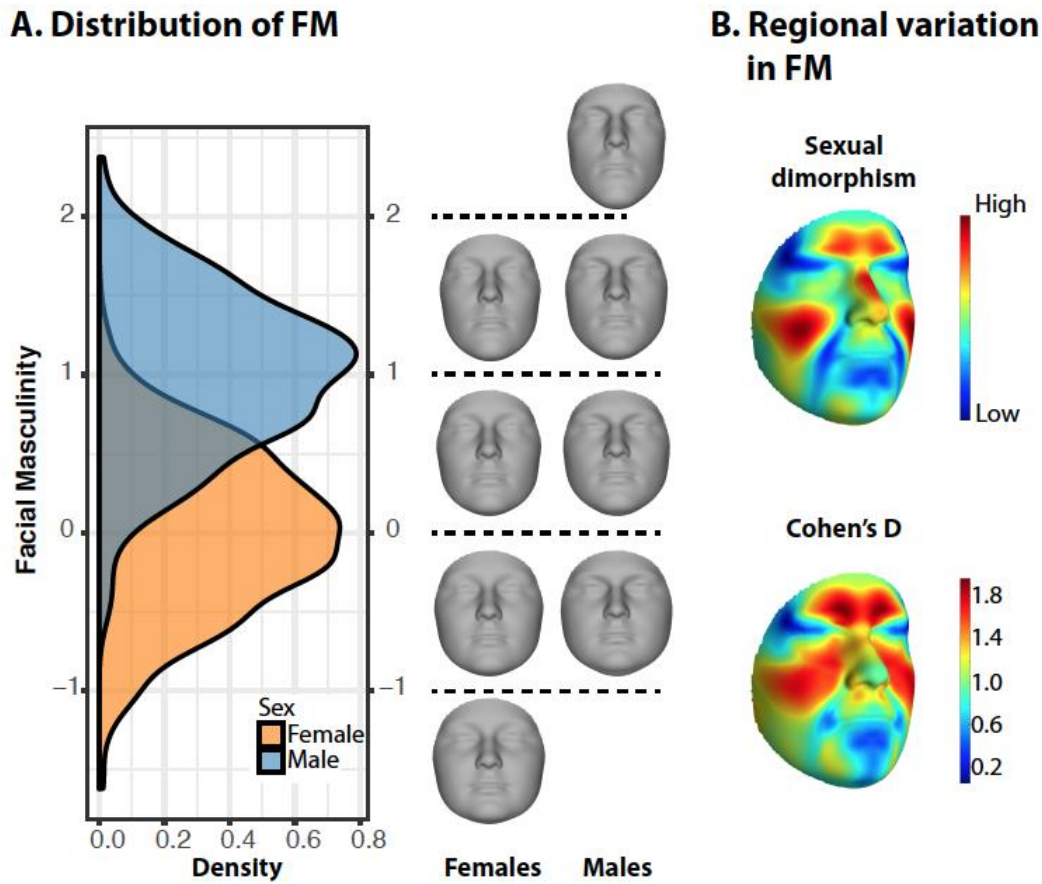

**Fig. 2:** Facial masculinity is positively correlated with height, even within the sexes. A) Relationship between  $FM_{overall}$  and height. B) Results of linear model between  $FM_{QL}$  and height

and other covariates. Regions in yellow are significant after Bonferroni correction for 7,150 QLs ( $p < 0.05/7150$ ). Fig. S9 shows results for all covariates.

### A. Relationship between overall FM and height

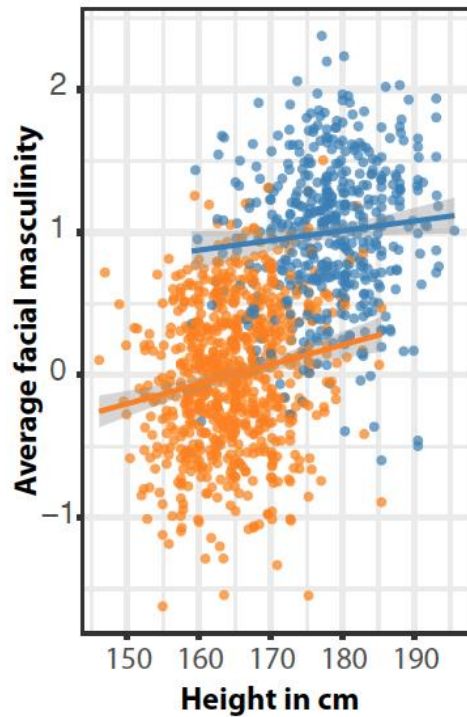

### B. Linear model results using regional FM as predictor

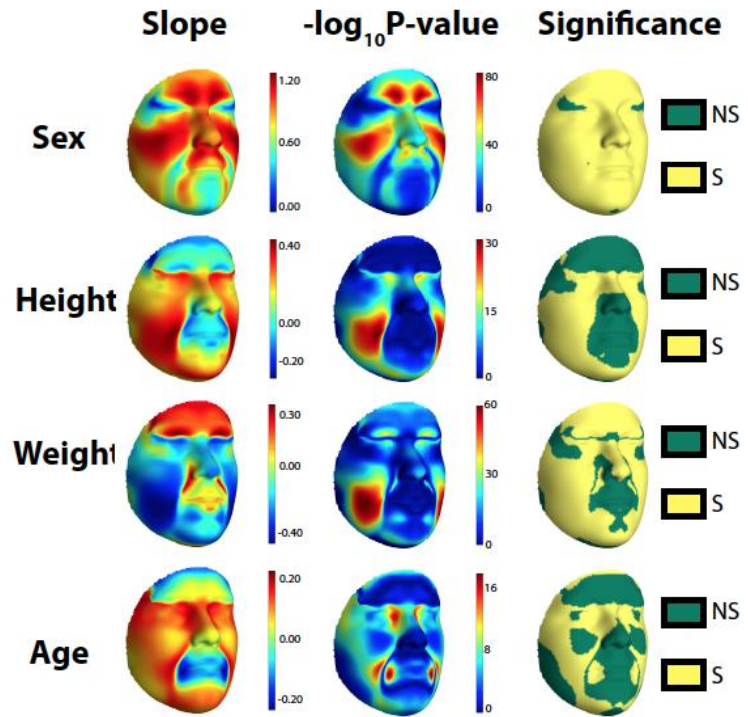

Table 1: Results of linear model between  $FM_{\text{overall}}$  and height with covariates. Slopes are standardized regression coefficients. Bonferroni cutoff for significance is  $0.05 / 7 = 0.007$ .

|               | <i>Slope</i> | <i>SE</i> | <i>T statistic</i> | <i>P value</i>                           |
|---------------|--------------|-----------|--------------------|------------------------------------------|
| <i>Sex</i>    | 1.240        | 0.058     | 21.46              | <b><math>5.55 \times 10^{-87}</math></b> |
| <i>Height</i> | 0.260        | 0.030     | 8.81               | <b><math>4.17 \times 10^{-18}</math></b> |
| <i>Age</i>    | 0.109        | 0.020     | 5.60               | <b><math>2.69 \times 10^{-08}</math></b> |
| <i>Weight</i> | -0.221       | 0.023     | -9.64              | <b><math>3.07 \times 10^{-21}</math></b> |
| <i>gPC1</i>   | -0.083       | 0.020     | -4.19              | <b><math>2.94 \times 10^{-05}</math></b> |
| <i>gPC2</i>   | -0.063       | 0.019     | -3.25              | <b><math>1.78 \times 10^{-03}</math></b> |
| <i>gPC3</i>   | -0.052       | 0.019     | -2.68              | $7.55 \times 10^{-03}$                   |

Table 2: Results of linear model between height and MHC heterozygosity. Slopes are standardized regression coefficients. Bonferroni cutoff for significance is  $0.05 / 7 = 0.007$ .

|                         | <i>Slope</i> | <i>SE</i> | <i>T statistic</i> | <i>P value</i>                            |
|-------------------------|--------------|-----------|--------------------|-------------------------------------------|
| <i>MHC het.</i>         | 0.063        | 0.025     | 3.18               | <b><math>1.54 \times 10^{-03}</math></b>  |
| <i>Genome-wide het.</i> | -0.007       | 0.020     | -0.36              | 0.72                                      |
| <i>Sex</i>              | 1.452        | 0.040     | 36.20              | <b><math>9.43 \times 10^{-196}</math></b> |
| <i>Age</i>              | 0.022        | 0.020     | 1.11               | 0.266                                     |
| <i>gPC1</i>             | 0.122        | 0.020     | 6.11               | <b><math>1.36 \times 10^{-09}</math></b>  |
| <i>gPC2</i>             | 0.051        | 0.020     | 2.54               | <b><math>1.14 \times 10^{-02}</math></b>  |
| <i>gPC3</i>             | 0.014        | 0.020     | 0.70               | 0.49                                      |
